# Supplementary material for: Vertical and lateral morphology effects on solar cell performance for a thiophene–quinoxaline copolymer:PC70BM blend
Source: Royal Society of Chemistry journal article supplement (doi:10.1039/c5ta00683j), 2015-01-01
Supplement: c5ta00683j1.pdf [file c5ta00683j1.pdf]

Supplementary material

**Vertical and lateral morphology effects on solar cell performance for a thiophene-  
quinoxaline copolymer:PC<sub>70</sub>BM blend.**

*Rickard Hansson,<sup>a</sup> Leif Ericsson,<sup>a</sup> Natalie P. Holmes,<sup>b</sup> Jakub Rysz,<sup>c</sup> Andreas Opitz,<sup>d</sup> Mariano Campoy-Quiles,<sup>e</sup> Ergang Wang,<sup>f</sup> Matthew G. Barr,<sup>b</sup> A. L. David Kilcoyne,<sup>g</sup> Xiaojing Zhou,<sup>b</sup> Paul Dastoor<sup>b</sup> and Ellen Moons<sup>a</sup>*

<sup>a</sup>Department of Engineering and Physics, Karlstad University, 65188 Karlstad, Sweden

<sup>b</sup>Centre for Organic Electronics, University of Newcastle, Callaghan, NSW 2308, Australia

<sup>c</sup>Institute of Physics, Jagiellonian University, 30-059 Kraków, Poland

<sup>d</sup>Department of Physics, Humboldt-Universität zu Berlin, 12489 Berlin, Germany

<sup>e</sup>Institut de Ciència de Materials de Barcelona (ICMAB-CSIC), Campus UAB, Bellaterra, 08193, Spain

<sup>f</sup>Department of Chemistry and Chemical Engineering, Chalmers University of Technology, 41296 Göteborg, Sweden

<sup>g</sup>Advanced Light Source, Lawrence Berkeley National Laboratory, Berkeley, CA 94720, USA

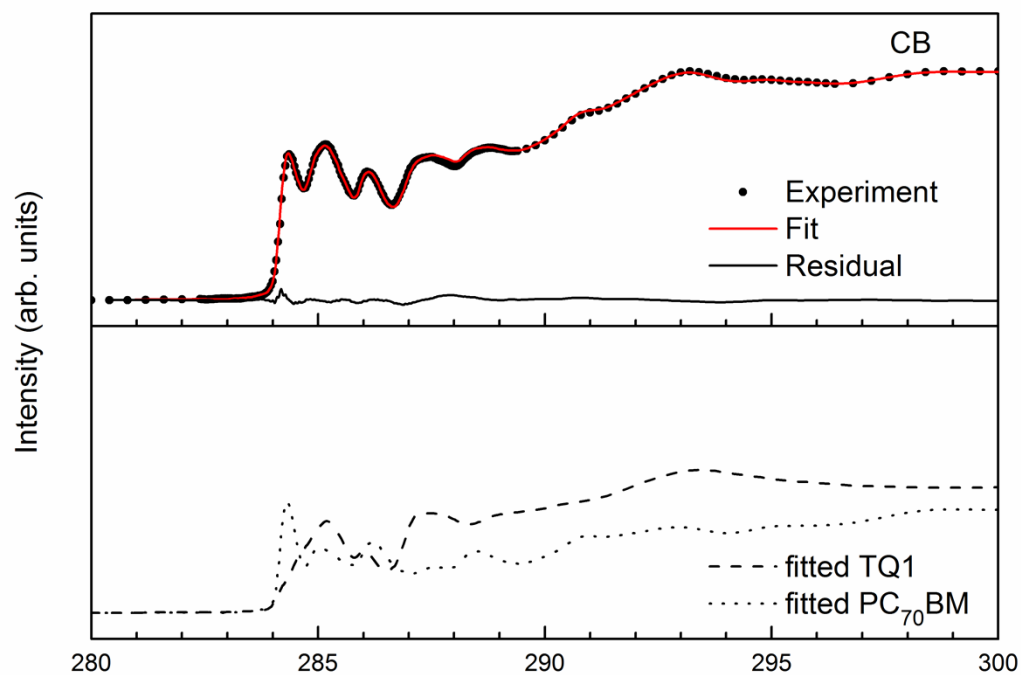

**Figure S1.** C1s NEXAFS spectrum measured at 55° on a 1:3 w/w TQ1:PC<sub>70</sub>BM blend film from CB, measured in TEY mode together with the best fit and the residual. Shown below are the fitted components extracted from the fit.

### **Interpretation of the $m/q = 26$ d-SIMS depth profile**

The secondary ions with  $m/q = 32$  can exclusively be assigned to  $S^-$  from TQ1. The secondary ions with  $m/q = 26$ , can however, apart from the main assignment to  $CN^-$  from TQ1, also be assigned to  $C_2H_2^-$  ions, which can originate both from the polymer and the fullerene. Therefore the  $m/q = 26$  profile is strictly speaking a mixed signal that originates from both components in the blend. (This is apparent from our observation that the  $m/q = 26$  signal is present also in the PS layer despite there being no nitrogen in PS.) However, since  $CN^-$  ions can only originate from TQ1 and assuming that the  $C_2H_2^-$  part of the signal is contributed from TQ1 and  $PC_{70}BM$  in a constant ratio, this signal should also show how the TQ1 concentration varies through the film. If this assumption is correct, any changes in the  $m/q = 26$  signal are due to changes in the TQ1 concentration. This is indeed supported by the fact that the depth profiles for  $m/q = 32$  and  $m/q = 26$  have very similar shapes throughout the active layer for all the blend films. Therefore, in the active layer, we can confidently interpret both the signals from  $m/q = 26$  and  $m/q = 32$  as markers for TQ1 concentration.
